# Supplementary material
Source: PubMed Central journal article supplement (PMC7321978)
Supplement: pnas.1921016117.sapp.pdf [file pnas.1921016117.sapp.pdf]

Supplementary Information for

Long-read bitter melon (*Momordica charantia*) genome and the genomic architecture of non-classic domestication

Hideo Matsumura<sup>&\*1</sup>, Min-Chien Hsiao<sup>&2</sup>, Ya-Ping Lin<sup>2</sup>, Atsushi Toyoda<sup>3</sup>, Naoki Taniai<sup>4</sup>, Kazuhiko Tarora<sup>4</sup>, Naoya Urasaki<sup>4</sup>, Shashi S. Anand<sup>2</sup>, Narinder P. S. Dhillon<sup>5</sup>, Roland Schafleitner<sup>6</sup>, Cheng-Ruei Lee<sup>\*278</sup>

1. Gene Research Center, Shinshu University, Ueda, Nagano, Japan
2. Institute of Ecology and Evolutionary Biology, National Taiwan University, Taipei, Taiwan
3. National Institute of Genetics, Mishima, Shizuoka, Japan
4. Okinawa Prefectural Agricultural Research Center, Itoman, Okinawa, Japan
5. World Vegetable Center East and Southeast Asia/Oceania, Kasetsart University, Kamphaeng Saen, Nakhon Pathom, Thailand
6. The World Vegetable Center, Tainan, Taiwan
7. Institute of Plant Biology, National Taiwan University, Taipei, Taiwan
8. Genome and Systems Biology Degree Program, National Taiwan University, Taipei, Taiwan

& These authors contribute equally

\* Author of correspondence

Cheng-Ruei Lee (chengrueilee@ntu.edu.tw)

Hideo Matsumura (hideoma@shinshu-u.ac.jp)

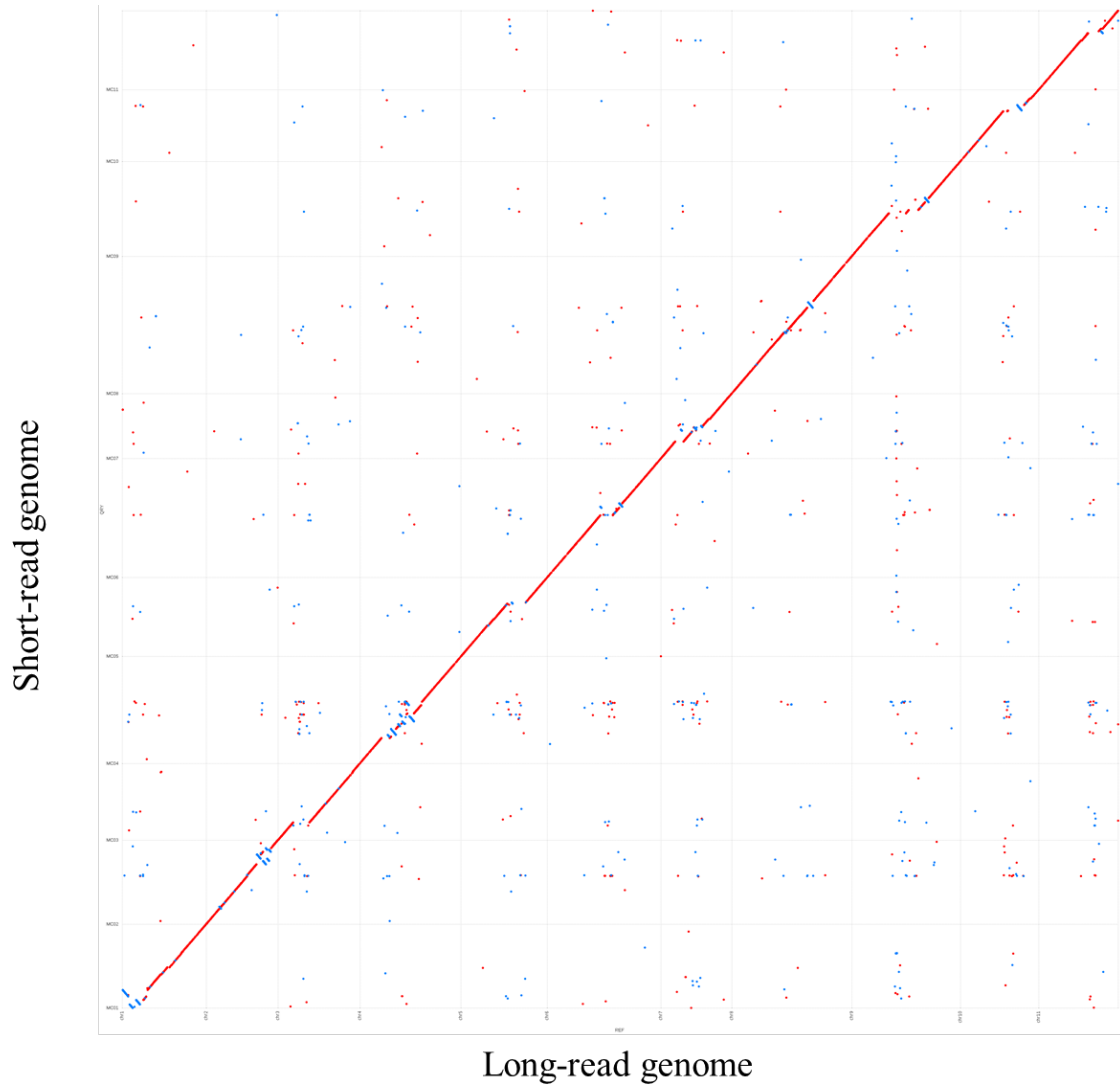

**Fig. S1.** Alignment of two versions of *M. charantia* genome. Short-read genome was the Dali-11 genome, and long-read genome was the PacBio assembly in this study. Red lines indicate alignments with identical orientation, whereas blue lines indicate the invert orientation between the two genomes.

(A)

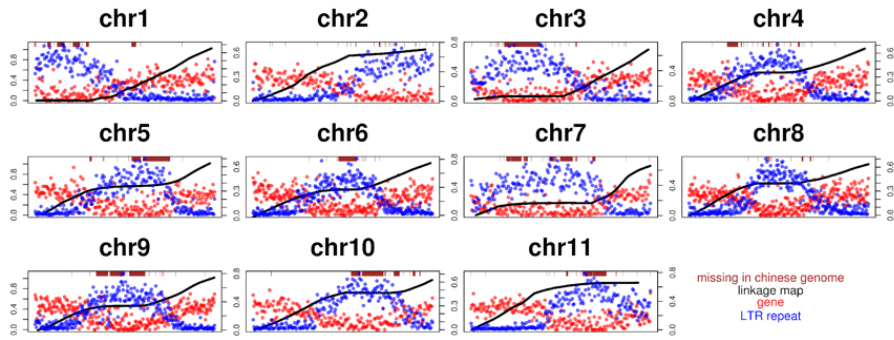

(B)

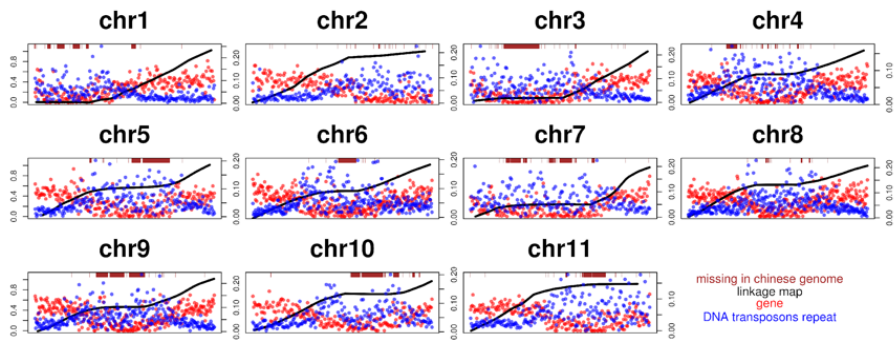

(C)

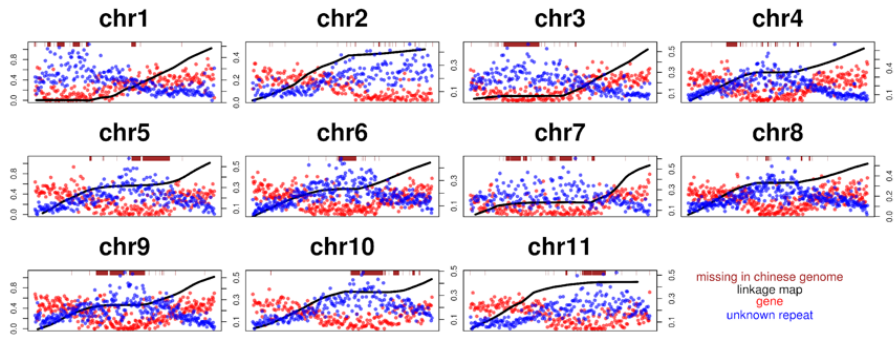

(D)

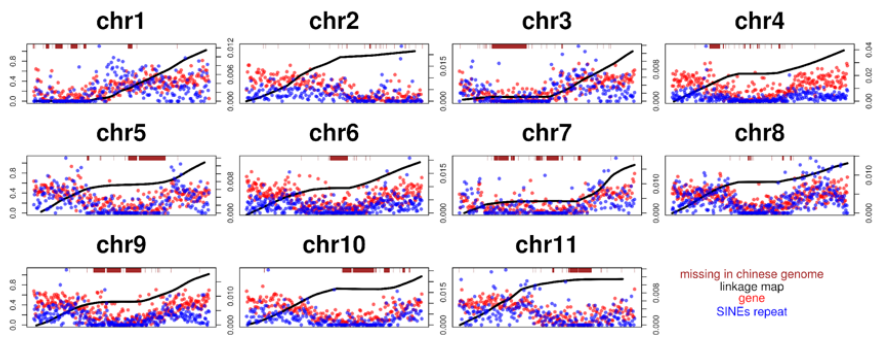

(E)

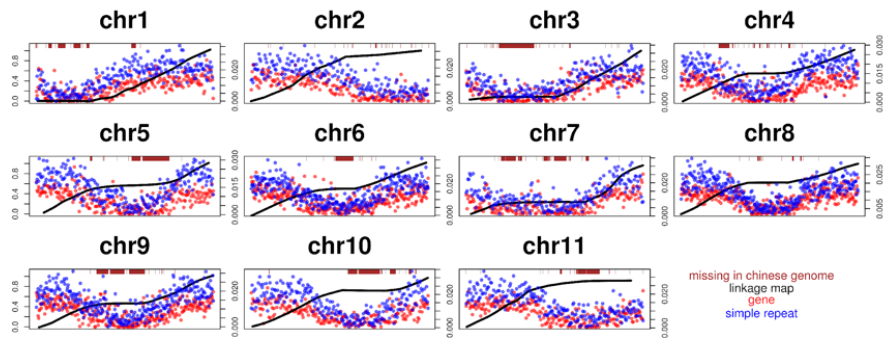

(F)

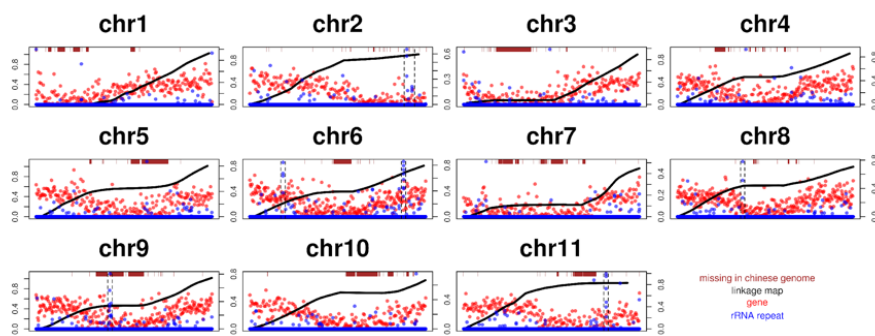

(G)

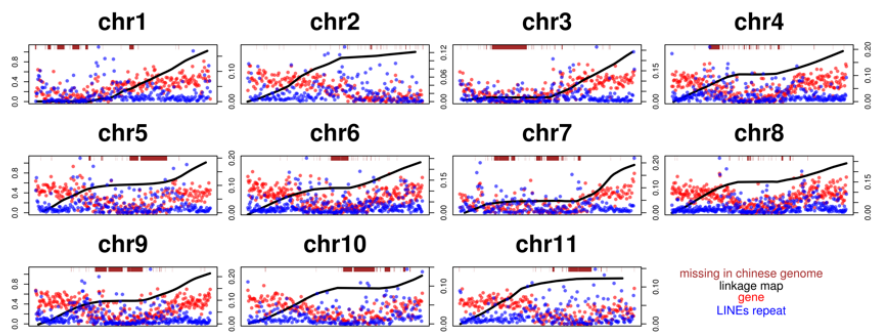

**Fig. S2.** Genomic distributions of different types of repetitive elements: (A) Long terminal repeats (LTR). (B) DNA transposons. (C) Unknown repeats. (D) Short interspersed nuclear elements (SINE). (E) Simple repeats. (F) rRNA. (G) Lone interspersed nuclear elements (LINE). Vertical dashed lines in (G) represent rRNA clusters.

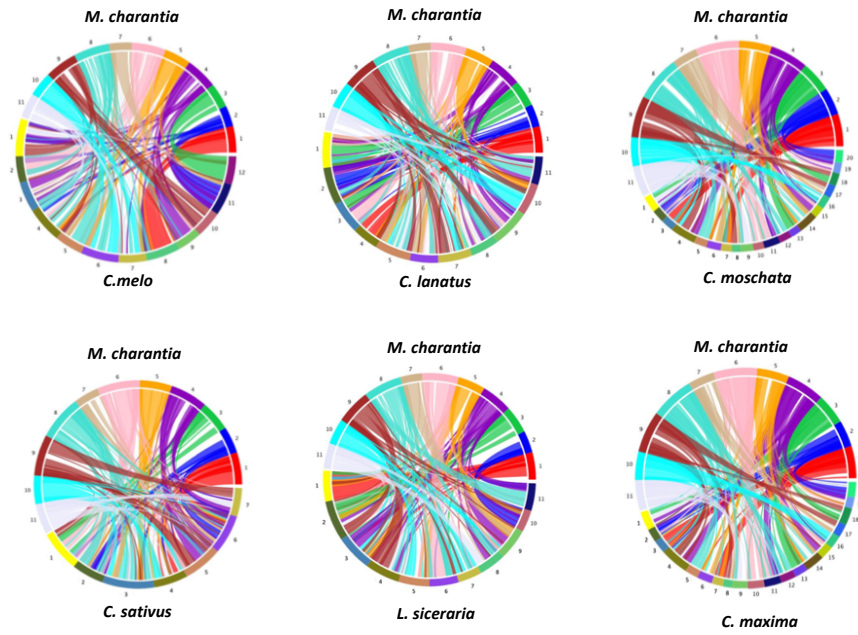

**Fig. S3.** Synteny comparison between our *M. charantia* assembly and six other Cucurbitaceae species, *Cucumis melo*, *Citrullus lanatus*, *Cucurbita moschata*, *Cucumis sativus*, *Lagenaria siceraria*, and *Cucurbita maxima*.

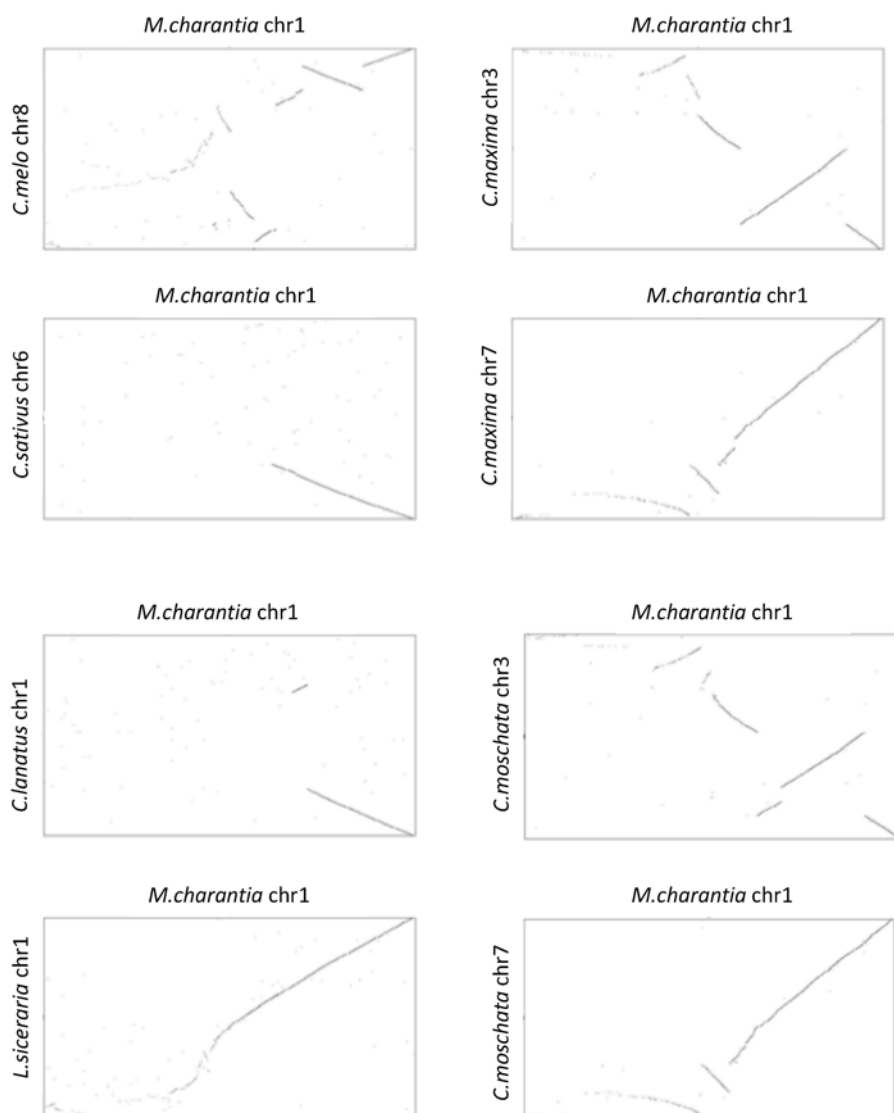

**Fig. S4.** Dotplots showing the synteny between *Momordica charantia* chromosome 1 and the corresponding chromosomes in six other Cucurbitaceae species, *Cucumis melo*, *Cucumis sativus*, *Citrullus lanatus*, *Lagenaria siceraria*, *Cucurbita moschata*, and *Cucurbita maxima*. The two *Cucurbita* species have two chromosomes matching *M. charantia* chromosome 1 due to whole-genome duplication.

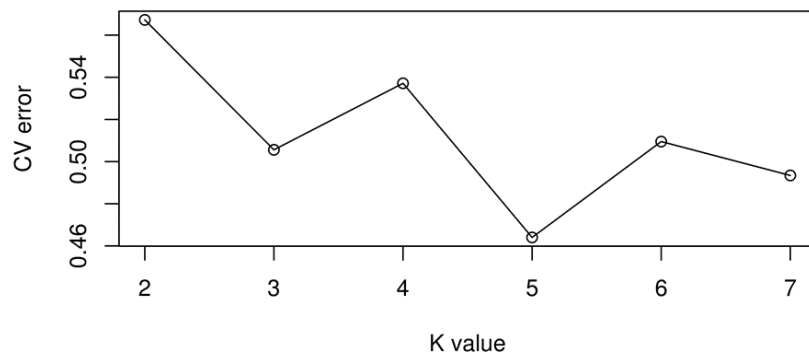

**Fig. S5.** ADMIXTURE cross validation errors for each K value.

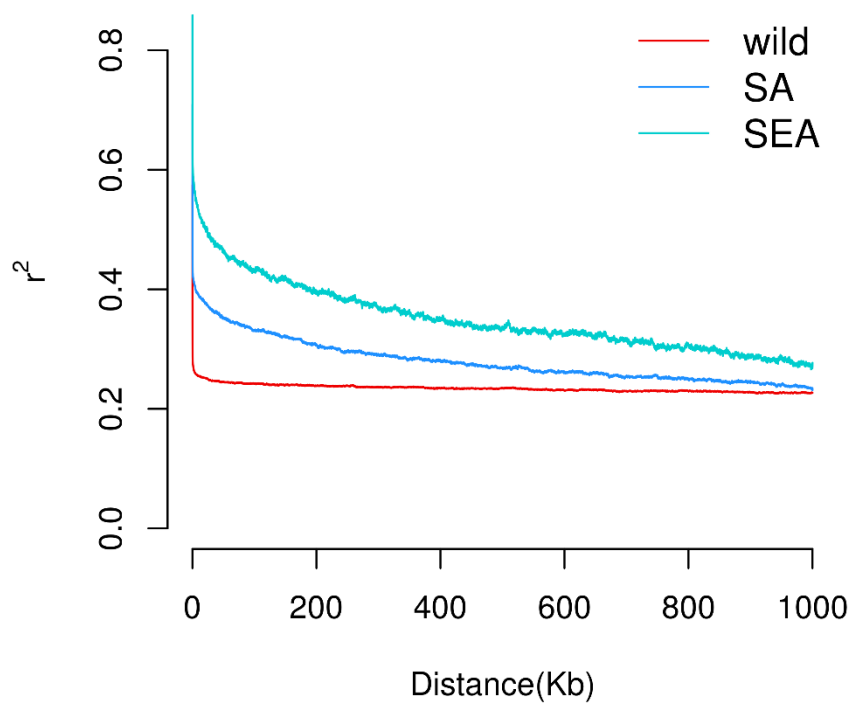

**Fig. S6.** Linkage disequilibrium (LD) decay of wild, South Asian (SA), and Southeast Asian (SEA) groups.



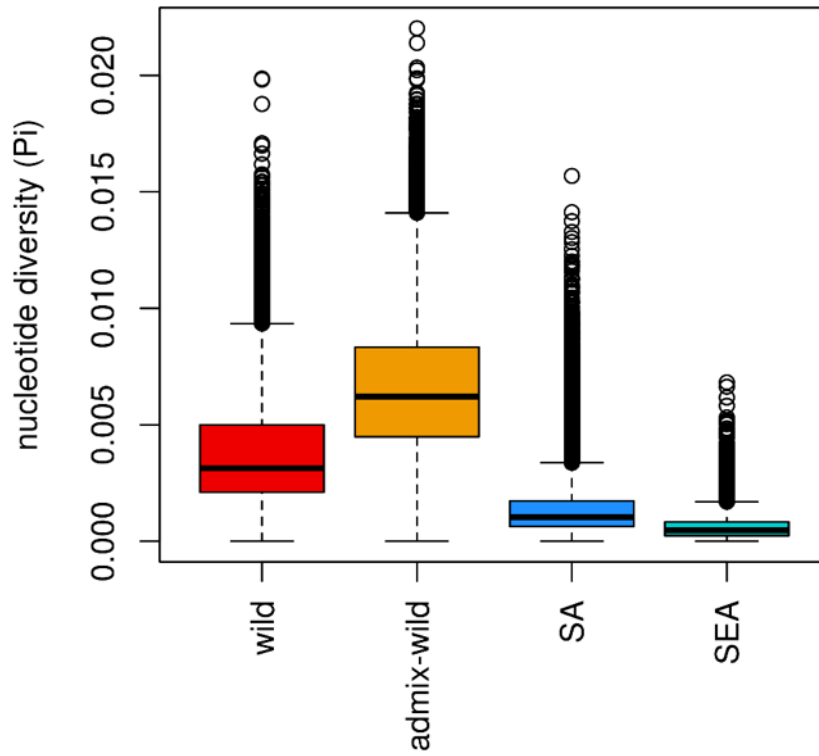

**Fig. S7.** Nucleotide diversity in 50-kb windows. The box represents median and the first and third quartiles of each distribution. The whiskers extend 1.5 interquartile range beyond the quartiles, with minimum value at zero. SA: South Asian cultivars. SEA: Southeast Asian cultivars.

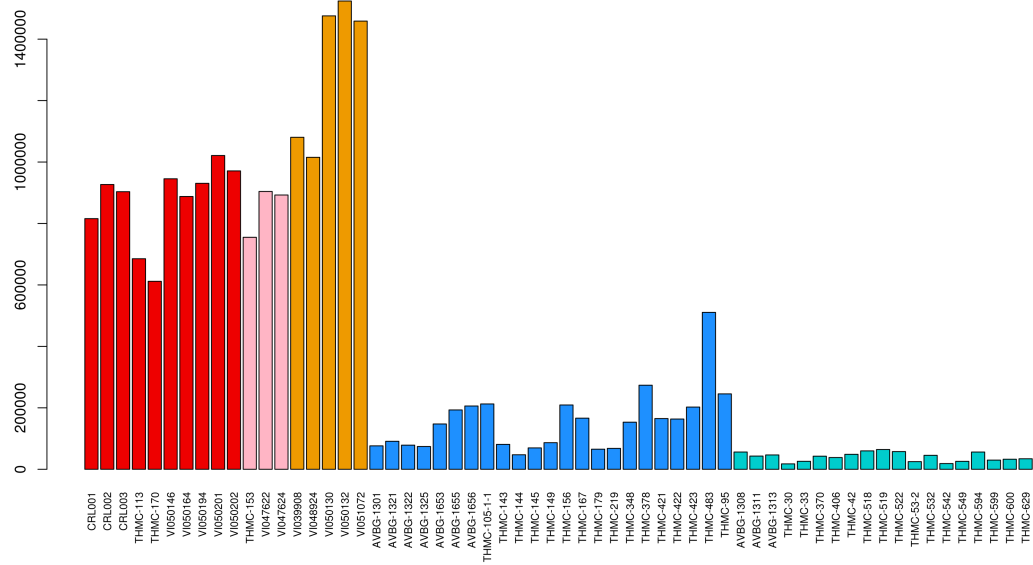

**Fig. S8.** Number of heterozygous sites of each individual. Red, pink, orange, blue, and light blue represent the Taiwan wild group (TAI), Thailand wild group (THAI), admix-wild group, South Asian cultivar group (SA), and Southeast Asian cultivar group (SEA).

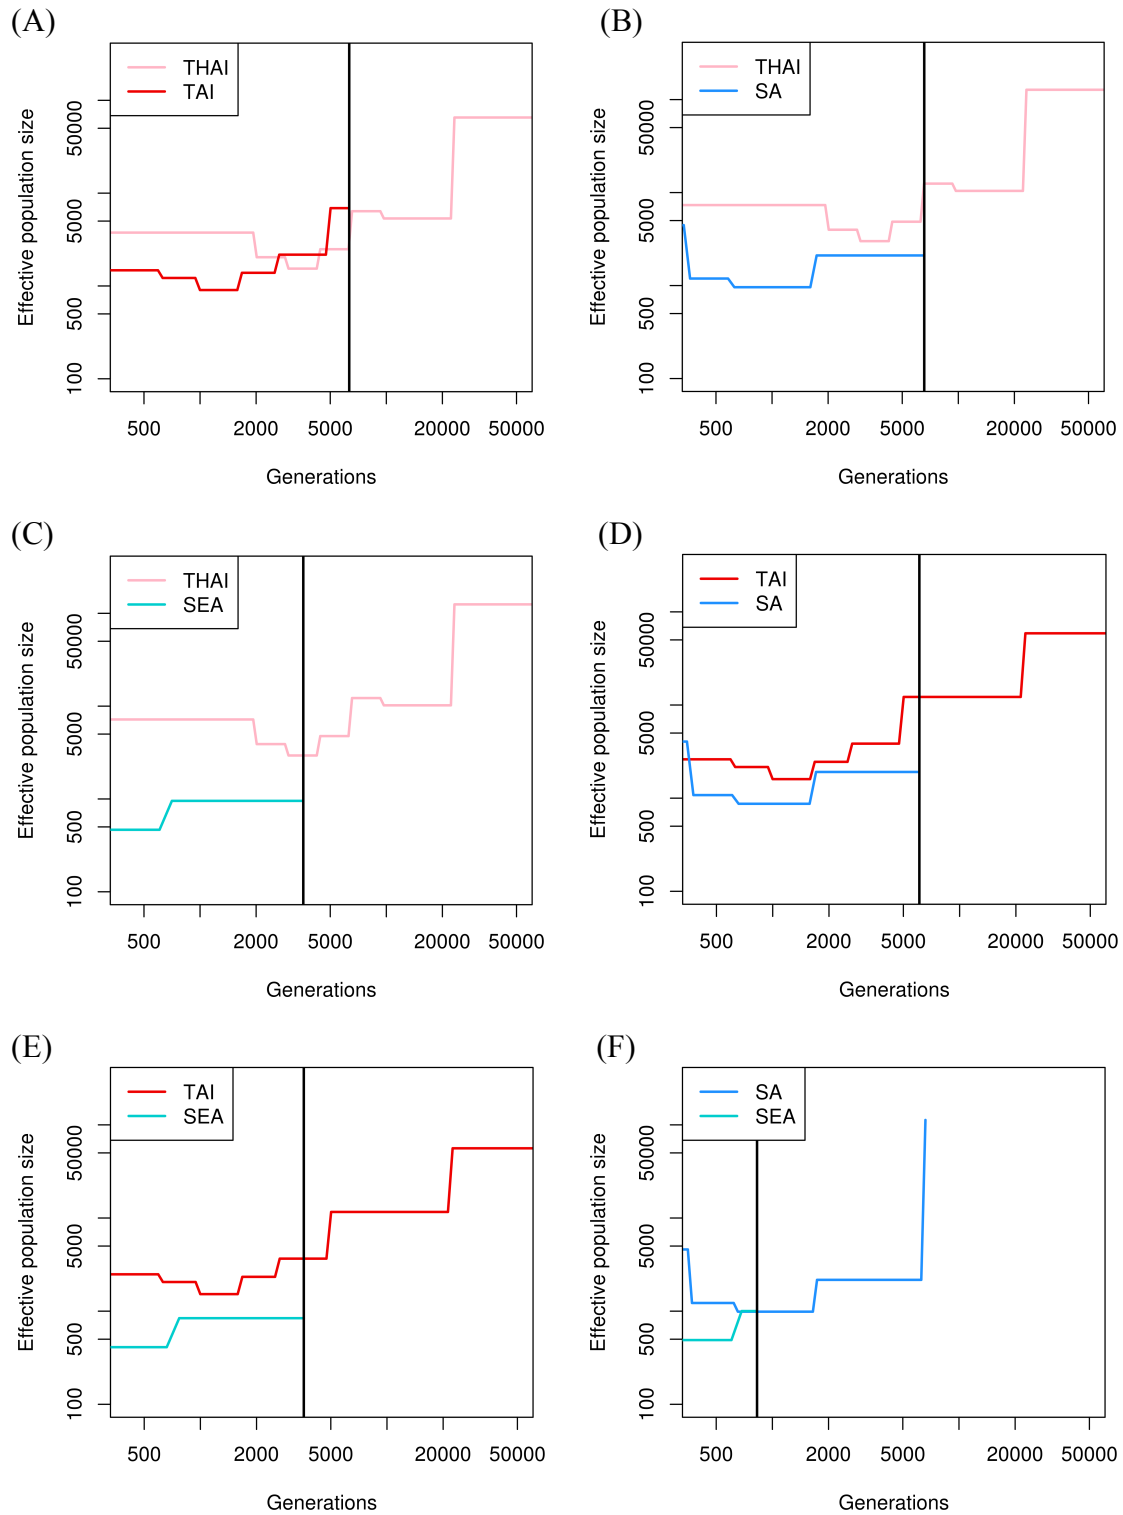

**Fig. S9.** Pairwise population divergence time estimation with SMC++: (A) THAI and TAI. (B) THAI and SA. (C) THAI and SEA. (D) TAI and SA. (E) TAI and SEA. (F) SA and SEA. Blacklines denote the estimated divergence time. THAI: the Thailand wild group. TAI: the Taiwan wild group. SA: the South Asian cultivar group. SEA: the Southeast Asian cultivar group.

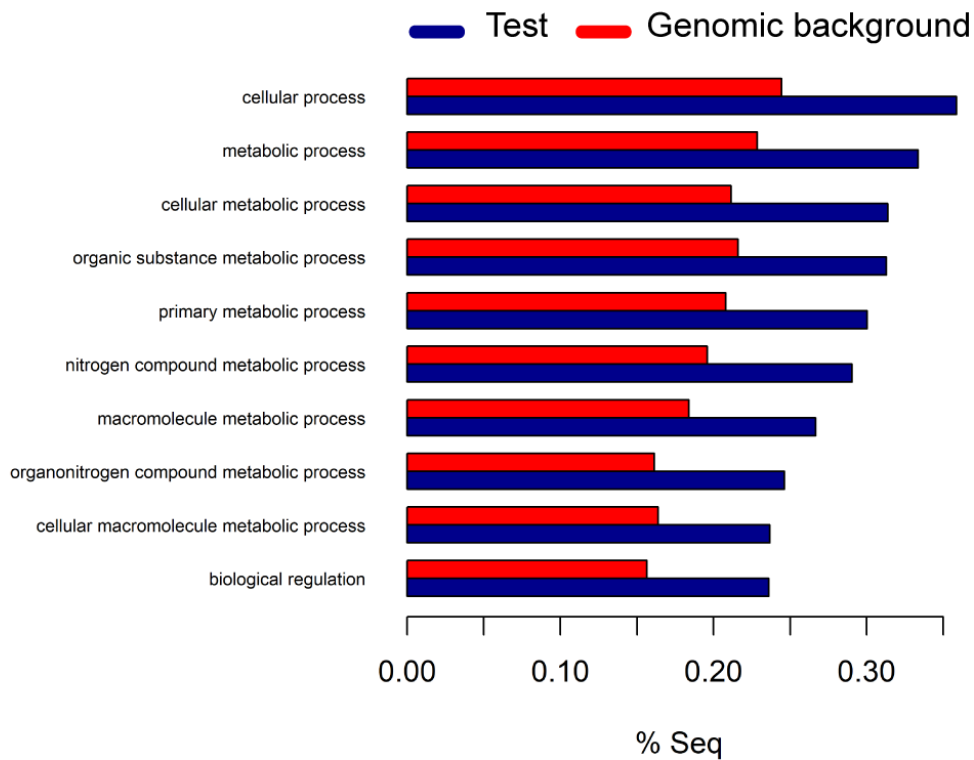

**Fig. S10.** Significant biological process terms in GO enrichments performed with the selection regions: the union of the top 1% windows of each method to test for signatures of selection. Red bars represent the genomic background for reference, and blue bars represent the selection regions. The horizontal axis is the percentage of a particular term in test or reference set.

**Table S1.** Comparison of genome assemblies in Cucurbitaceae

|                                            | <i>Cucumis sativus</i> | <i>Citrullus lanatus</i> | <i>Citrullus lanatus</i> (charleston gray) | <i>Citrullus lanatus</i> (97103_v2) | <i>Cucurbita argyrosperma</i> | <i>Cucurbita pepo</i> | <i>Lagenaria siceraria</i> | <i>Cucumis melo</i> | <i>Momordica charantia</i> (2017 assembly) | <i>Momordica charantia</i> (Dali-11 assembly) | <i>Momordica charantia</i> (this study) |
|--------------------------------------------|------------------------|--------------------------|--------------------------------------------|-------------------------------------|-------------------------------|-----------------------|----------------------------|---------------------|--------------------------------------------|-----------------------------------------------|-----------------------------------------|
| assembly size (Mb)                         | 243                    | 353                      | 396                                        | 365                                 | 229                           | 263                   | 313.4                      | 375                 | 285                                        | 294                                           | 303                                     |
| Contig N50 (kb)                            | 19.8                   | 26.4                     | 36.7                                       | 2,300                               | 463.4                         | 110.0                 | 28.3                       | 60.8                | 21.9                                       | 62.6                                          | 9,898.0                                 |
| scaffold N50 (kb)                          | 1,140                  | 2,380                    | 7,471                                      | 21,900                              | 620                           | 1,750                 | 8,701                      | 4,680               | 1,101                                      | 611                                           | 25,371                                  |
| sequence on chromosome (Mb)                | 176.9                  | 330                      | 378.7                                      | 362.7                               | 0                             | 214.1                 | 297.6                      | 337.5               | 0                                          | 251                                           | 291.7                                   |
| sequence on chromosome / assembly size (%) | 72.80                  | 93.48                    | 95.63                                      | 99.3                                | 0.00                          | 81.41                 | 94.96                      | 90.00               | 0.00                                       | 85.37                                         | 96.27                                   |

**Table S2.** Repeat annotation of *Momordica charantia*

|                |                                                   |                 |                           |
|----------------|---------------------------------------------------|-----------------|---------------------------|
| total length   | 302,992,168 bp (302,989,368 bp excluding N sites) |                 |                           |
| GC level       | 35.56%                                            |                 |                           |
| bases masked   | 159,137,698 bp (52.52 %)                          |                 |                           |
|                | number of<br>elements                             | length occupied | percentage of<br>sequence |
| SINEs          | 7,730                                             | 880,637         | 0.29                      |
| tRNA           | 6,704                                             | 709,276         | 0.23                      |
| LINEs          | 28,173                                            | 8,192,849       | 2.7                       |
| L1             | 18,359                                            | 7,449,099       | 2.46                      |
| RTE-BovB       | 7,970                                             | 513,592         | 0.17                      |
| LTR elements   | 95,383                                            | 72,614,725      | 23.97                     |
| Gypsy          | 44,031                                            | 40,679,168      | 13.43                     |
| Copia          | 34,651                                            | 25,113,678      | 8.29                      |
| DNA elements   | 59,043                                            | 15,543,591      | 5.13                      |
| MULE-MuDR      | 25,621                                            | 6,698,338       | 2.21                      |
| CMC-EnSpm      | 10,434                                            | 3,779,991       | 1.25                      |
| Unclassified   | 215,486                                           | 57,350,078      | 18.93                     |
| small RNA      | 8,203                                             | 1,440,675       | 0.48                      |
| Satellites     | 1,552                                             | 292,321         | 0.1                       |
| Simple repeats | 86,358                                            | 3,354,855       | 1.11                      |
| Low complexity | 21,080                                            | 1,021,681       | 0.34                      |

**Table S3.** Repeat comparison between two *Momordica charantia* assemblies

|                           | <i>Momordica charantia</i><br>(Dali-11) | <i>Momordica charantia</i><br>(this study) |
|---------------------------|-----------------------------------------|--------------------------------------------|
| Genome size               | 251,380,684                             | 302,989,368                                |
| Repeat percentage         | 45.43                                   | 52.52                                      |
| DNA elements              | 12,216,336                              | 15,543,591                                 |
| DNA elements percentage   | 4.86                                    | 5.13                                       |
| LINE                      | 6,913,599                               | 8,192,849                                  |
| LINE percentage           | 2.75                                    | 2.7                                        |
| LTR                       | 49,059,921                              | 72,614,725                                 |
| LTR percentage            | 19.52                                   | 23.97                                      |
| SINE                      | 804,878                                 | 880,637                                    |
| SINE percentage           | 0.32                                    | 0.29                                       |
| simple repeats            | 2,982,683                               | 4,668,857                                  |
| simple repeats percentage | 1.19                                    | 1.55                                       |
| unknown                   | 41,510,819                              | 57,350,078                                 |
| unknown percentage        | 16.51                                   | 18.93                                      |

**Table S4.** Top 15 genes enriched for the top 0.1% SNPs with highest trait association

| Trait  | Gene       | Proportion SNPs with top 0.1% association | Annotation                                                                          |
|--------|------------|-------------------------------------------|-------------------------------------------------------------------------------------|
| Color  | chr10.2901 | 0.94                                      | BPA1_ARATH Binding partner of ACD11 1                                               |
| Color  | chr9.1019  | 0.71                                      | PPR76_ARATH Pentatricopeptide repeat-containing protein At1g51965, mitochondrial    |
| Color  | chr10.2733 | 0.65                                      | TPSGD_VITVI (-)-germacrene D synthase                                               |
| Color  | chr5.3365  | 0.56                                      | AGT23_ARATH Alanine--glyoxylate aminotransferase 2 homolog 3, mitochondrial         |
| Color  | chr5.3363  | 0.46                                      | TOL6_ARATH TOM1-like protein 6                                                      |
| Color  | chr10.2734 | 0.46                                      | RNH_HALSA Ribonuclease HI                                                           |
| Color  | chr9.1489  | 0.45                                      | PP268_ARATH Putative pentatricopeptide repeat-containing protein At3g47840          |
| Color  | chr8.1391  | 0.44                                      | NBP35_ARATH Cytosolic Fe-S cluster assembly factor NBP35                            |
| Color  | chr7.2532  | 0.35                                      | AKR1_SOYBN Probable aldo-keto reductase 1                                           |
| Color  | chr5.2799  | 0.30                                      | LPAT2_ARATH 1-acyl-sn-glycerol-3-phosphate acyltransferase 2                        |
| Color  | chr5.3367  | 0.29                                      | Y5370_ARATH PAN domain-containing protein At5g03700                                 |
| Color  | chr8.1392  | 0.29                                      | G6PD_SOLTU Glucose-6-phosphate 1-dehydrogenase, cytoplasmic isoform                 |
| Color  | chr1.2324  | 0.29                                      | SAP4_ARATH Zinc finger A20 and AN1 domain-containing stress-associated protein 4    |
| Color  | chr6.3557  | 0.27                                      | APRR2_ARATH Two-component response regulator-like APRR2                             |
| Color  | chr8.3849  | 0.26                                      | MYC4_ARATH Transcription factor MYC4                                                |
| Length | chr7.839   | 0.74                                      | Y3093_ARATH Uncharacterized protein At3g60930, chloroplastic                        |
| Length | chr4.3687  | 0.53                                      | RS193_ARATH 40S ribosomal protein S19-3                                             |
| Length | chr7.840   | 0.50                                      | ADS3_ARATH Palmitoyl-monogalactosyldiacylglycerol delta-7 desaturase, chloroplastic |
| Length | chr6.2989  | 0.37                                      | EIX2_SOLLIC Receptor-like protein EIX2                                              |
| Length | chr4.3689  | 0.27                                      | U83A1_ARATH UDP-glycosyltransferase 83A1                                            |
| Length | chr8.590   | 0.25                                      | ANT_ARATH AP2-like ethylene-responsive transcription factor ANT                     |
| Length | chr3.267   | 0.21                                      | PPP7L_ARATH Serine/threonine-protein phosphatase 7 long form homolog                |
| Length | chr8.443   | 0.20                                      | BRT1_ARATH Adenine nucleotide transporter BT1, chloroplastic/mitochondrial          |
| Length | chr11.2845 | 0.19                                      | DRP2B_ARATH Dynamin-2B OS=Arabidopsis thaliana                                      |



|        |           |      |                                                                          |
|--------|-----------|------|--------------------------------------------------------------------------|
| Length | chr4.2162 | 0.15 | DXR_ORYSJ 1-deoxy-D-xylulose 5-phosphate reductoisomerase, chloroplastic |
| Length | chr9.408  | 0.14 | PRP8A_ARATH Pre-mRNA-processing-splicing factor 8A                       |
| Length | chr5.3007 | 0.12 | KN5C_TOBAC Kinesin-like protein KIN-5C                                   |
| Length | chr8.413  | 0.12 | NAA50_XENTR N-alpha-acetyltransferase 50                                 |
| Length | chr4.3309 | 0.12 | OPF13_ARATH Transcription repressor OFP13                                |
| Length | chr8.533  | 0.10 | ACL5_ARATH Thermospermine synthase ACAULIS5                              |
| Spine  | chr6.3621 | 0.47 | RCD1_ARATH Inactive poly [ADP-ribose] polymerase RCD1                    |
| Spine  | chr2.2718 | 0.33 | PPP7L_ARATH Serine/threonine-protein phosphatase 7 long form homolog     |
| Spine  | chr2.2736 | 0.30 | PPP7L_ARATH Serine/threonine-protein phosphatase 7 long form homolog     |
| Spine  | chr6.3605 | 0.30 | ATL29_ARATH RING-H2 finger protein ATL29                                 |
| Spine  | chr5.3210 | 0.27 | IDM1_ARATH Increased DNA methylation 1                                   |
| Spine  | chr2.2431 | 0.27 | ATPAM_MAIZE ATP synthase subunit alpha, mitochondrial                    |
| Spine  | chr2.2752 | 0.25 | SBT4E_ARATH Subtilisin-like protease SBT4.14                             |
| Spine  | chr6.3609 | 0.25 | Y4958_ARATH Uncharacterized membrane protein At4g09580                   |
| Spine  | chr2.2814 | 0.24 | POL_AVIRE Gag-Pol polyprotein (Fragment)                                 |
| Spine  | chr6.3531 | 0.21 | CAAT6_ARATH Cationic amino acid transporter 6, chloroplastic             |
| Spine  | chr6.3601 | 0.21 | TRN2_ARATH Protein TORNADO 2                                             |
| Spine  | chr8.725  | 0.20 | PX11A_ARATH Peroxisomal membrane protein 11A                             |
| Spine  | chr2.2733 | 0.20 | PPP7L_ARATH Serine/threonine-protein phosphatase 7 long form homolog     |
| Spine  | chr8.4288 | 0.19 | IAA14_ARATH Auxin-responsive protein IAA14                               |
| Spine  | chr2.2437 | 0.19 | ATESY_VITVI (-)-alpha-terpineol synthase                                 |

---

**Table S5.** Accessions used in this study

| <b>Accession</b> | <b>Country of collection</b> | <b>Origin</b> | <b>Color</b> | <b>Length</b> | <b>Skin pattern</b> | <b>Genetic group</b> |
|------------------|------------------------------|---------------|--------------|---------------|---------------------|----------------------|
| AVBG1308         | Philippines                  | Cultivar      | Medium green | Medium        | Spiny               | SEA                  |
| AVBG1311         | Thailand                     | Cultivar      | Light green  | Medium        | Smooth              | SEA                  |
| AVBG1313         | Thailand                     | Cultivar      | Light green  | Long          | Smooth              | SEA                  |
| AVBG1321         | India                        | Cultivar      | Green        | Medium        | Spiny               | SA                   |
| AVBG1322         | India                        | Cultivar      | Green        | Medium        | Spiny               | SA                   |
| AVBG1325         | India                        | Cultivar      | Green        | Long          | Spiny               | SA                   |
| AVBG1653         | Bangladesh                   | Cultivar      | Green        | Medium        | Spiny               | SA                   |
| AVBG1655         | Bangladesh                   | Cultivar      | Green        | Medium        | Spiny               | SA                   |
| AVBG1656         | Bangladesh                   | Cultivar      | Green        | Medium        | Spiny               | SA                   |
| THMC 105-1-1     | Bangladesh                   | Cultivar      | Green        | Short         | Smooth              | SA                   |
| THMC113          | Belize                       | Cultivar      | Green        | Short         | Spiny               | TAI                  |
| THMC143          | India                        | Cultivar      | Medium green | Medium        | Spiny               | SA                   |
| THMC144          | India                        | Cultivar      | Green        | Medium        | Smooth              | SA                   |
| THMC145          | India                        | Cultivar      | Medium green | Medium        | Spiny               | SA                   |
| THMC149          | India                        | Cultivar      | Green        | Long          | Smooth              | SA                   |
| THMC153          | Thailand                     | Cultivar      | Green        | Short         | Spiny               | THAI                 |
| THMC156          | India                        | Cultivar      | Green        | Short         | Spiny               | SA                   |
| THMC167          | India                        | Cultivar      | Dark green   | Medium        | Spiny               | SA                   |
| THMC170          | Taiwan                       | Cultivar      | Green        | Short         | Spiny               | TAI                  |
| THMC179          | India                        | Cultivar      | White        | Long          | Spiny               | SA                   |
| THMC219          | Pakistan                     | Cultivar      | Green        | Long          | Spiny               | SA                   |
| THMC30           | Philippines                  | Cultivar      | Green        | Long          | Smooth              | SEA                  |

|          |             |          |              |        |        |     |
|----------|-------------|----------|--------------|--------|--------|-----|
| THMC33   | Philippines | Cultivar | Dark green   | Medium | Smooth | SEA |
| THMC348  | Bangladesh  | Cultivar | Green        | Long   | Spiny  | SA  |
| THMC370  | Vietnam     | Cultivar | Light green  | Short  | Smooth | SEA |
| THMC378  | Thailand    | Cultivar | Light green  | Short  | Smooth | SA  |
| THMC406  | Vietnam     | Cultivar | Light green  | Medium | Smooth | SEA |
| THMC42   | Philippines | Cultivar | Medium green | Long   | Smooth | SEA |
| THMC421  | Bangladesh  | Cultivar | Green        | Long   | Spiny  | SA  |
| THMC422  | Bangladesh  | Cultivar | Green        | Long   | Spiny  | SA  |
| THMC423  | Bangladesh  | Cultivar | Green        | Long   | Spiny  | SA  |
| THMC483  | Bangladesh  | Cultivar | Green        | Medium | Spiny  | SA  |
| THMC518  | Vietnam     | Cultivar | Light green  | Long   | Spiny  | SEA |
| THMC519  | Vietnam     | Cultivar | Light green  | Medium | Smooth | SEA |
| THMC522  | China       | Cultivar | Light green  | Long   | Smooth | SEA |
| THMC532  | China       | Cultivar | Light green  | Long   | Smooth | SEA |
| THMC53-2 | Philippines | Cultivar | Green        | Short  | Smooth | SEA |
| THMC542  | China       | Cultivar | Dark green   | NA     | Smooth | SEA |
| THMC549  | China       | Cultivar | Green        | Long   | Spiny  | SEA |
| THMC594  | China       | Cultivar | Light green  | Long   | Smooth | SEA |
| THMC599  | China       | Cultivar | Light green  | Long   | Smooth | SEA |
| THMC600  | China       | Cultivar | Light green  | Long   | Smooth | SEA |
| THMC629  | China       | Cultivar | Light green  | Long   | Smooth | SEA |
| THMC95   | Bangladesh  | Cultivar | Green        | Long   | Spiny  | SA  |
| CRL001   | Taiwan      | Wild     | Green        | Short  | Spiny  | TAI |
| CRL002   | Taiwan      | Wild     | Green        | Short  | Spiny  | TAI |
| CRL003   | Taiwan      | Wild     | Green        | Short  | Spiny  | TAI |

|          |             |      |       |       |       |       |
|----------|-------------|------|-------|-------|-------|-------|
| VI039908 | Thailand    | Wild | Green | Short | Spiny | ADMIX |
| VI047622 | Thailand    | Wild | Green | Short | Spiny | THAI  |
| VI047624 | Thailand    | Wild | Green | Short | Spiny | THAI  |
| VI048924 | Thailand    | Wild | Green | Short | Spiny | ADMIX |
| VI050130 | Taiwan      | Wild | Green | Short | Spiny | ADMIX |
| VI050132 | Taiwan      | Wild | Green | Short | Spiny | ADMIX |
| VI050146 | Taiwan      | Wild | Green | Short | Spiny | TAI   |
| VI050164 | Taiwan      | Wild | Green | Short | Spiny | TAI   |
| VI051072 | Philippines | Wild | Green | Short | Spiny | ADMIX |
| VI050194 | Taiwan      | Wild | Green | Short | Spiny | TAI   |
| VI050201 | Taiwan      | Wild | Green | Short | Spiny | TAI   |
| VI050202 | Taiwan      | Wild | Green | Short | Spiny | TAI   |

---

**Table S6.** *MatK* primer sequences for validating *Momordica cochinchinensis* samples

| Primer  | 5' sequence 3'                    |
|---------|-----------------------------------|
| matK-AF | CTA TAT CCA CTT ATC TTT CAG GAG T |
| matK-8R | AAA GTT CTA GCA CAA GAA AGT CGA   |
